# Supplementary material for: Association between APOL1 risk variants and the occurrence of sepsis in Black patients hospitalized with infections: a retrospective cohort study
Source: eLife. 2023 Oct 26;12:RP88538. doi: 10.7554/eLife.88538 (PMC10602586; doi:10.7554/eLife.88538)
Supplement: Figure 1—source data 1. [file elife-88538-fig1-data1.xlsx]

## Sheet: Fig 1
Figure 1-source data 1. Association between APOL1 high-risk genotypes and the risk of sepsis, and septic shock, and individual sepsis organ dysfunction criteria: expanded summary data
Outcomes (adjusted for gender, age, and 3 PCs)	Total patients (N=2242)	APOL1 high-risk (N=361)	APOL1 low-risk (N=1881)	Odds Ratio	95% CI - lower bound	95% CI - upper bound	P-value
	N of events (%)	N of events (%)	N of events (%)
Sepsis	565 (25.2)	105 (29.1)	460 (24.5)	1.29	1.00	1.67	0.0467686
Septic shock	163 (7.3)	32 (8.9)	131 (7.0)	1.296	0.86	1.95	0.211238
Renal failure	303 (13.5)	67 (18.6)	236 (12.5)	1.64	1.21	2.22	0.00138093
Respiratory failure	136 (6.1)	14 (3.9)	122 (6.5)	0.57	0.33	1.01	0.0552738
Hematologic failure	102 (4.6)	15 (4.2)	87 (4.6)	0.86	0.49	1.51	0.599596
Cardiovascular failure	91 (4.1)	14 (3.9)	77 (4.1)	0.89	0.50	1.60	0.698469
Hepatic failure	83 (3.7)	13 (3.6)	70 (3.7)	1.02	0.56	1.88	0.941462
Short-term mortality	84 (3.8)	10 (2.8)	74 (3.9)	0.76	0.32	1.81	0.314746
red text indicates a statistically significant value
