# Supplementary material for: Association between APOL1 risk variants and the occurrence of sepsis in Black patients hospitalized with infections: a retrospective cohort study
Source: eLife. 2023 Oct 26;12:RP88538. doi: 10.7554/eLife.88538 (PMC10602586; doi:10.7554/eLife.88538)
Supplement: Figure 2—source data 1. [file elife-88538-fig2-data1.xlsx]

## Sheet: Fig 2
Figure 2-source data 1. Associations between APOL1 high-risk genotypes and the risk of sepsis and renal dysfunction before and after adjustment for renal disease, and exclusion of patients with pre-existing severe renal disease: expanded summary data
Outcome Models (all models adjusted for gender, age, and 3 PCs)	Total Patients		APOL1 high-risk (N=361)		APOL1 low-risk (N=1881)		Odds Ratio	95% CI - lower bound	95% CI - upper bound	P-value
	N	N of events (%)	N	N of events (%)	N	N of events (%)
Sepsis
Model 1: Sepsis with no additional adjustment	2242	565 (25.2)	361	105 (29.1)	1881	460 (24.5)	1.29	1	1.67	0.0467686
Model 2: Sepsis also adjusted for pre-existing renal disease	2242	565 (25.2)	361	105 (29.1)	1881	460 (24.5)	1.13811	0.876401	1.47797	0.3319
Model 3: Sepsis excluding patients with pre-existing renal disease	1784	380 (21.3)	240	50 (20.8)	1544	330 (21.4)	0.988137	0.703248	1.38844	0.945173
Renal dysfunction
Model 1: Renal dysfunction	2242	303 (13.5)	361	67 (18.6)	1881	236 (12.5)	1.64	1.21	2.22	0.00138093
Model 2: Renal dysfunction also adjusted for pre-existing renal disease	2242	303 (13.5)	361	67 (18.6)	1881	236 (12.5)	1.36219	0.995165	1.86458	0.053643
Model 3: Renal dysfunction excluding patients with pre-existing renal disease	1784	175 (9.8)	240	26 (10.8)	1554	149 (9.6)	1.15917	0.74	1.81	0.517805
red text indicates a statistically significant value
