# Supplementary material for: Association between APOL1 risk variants and the occurrence of sepsis in Black patients hospitalized with infections: a retrospective cohort study
Source: eLife. 2023 Oct 26;12:RP88538. doi: 10.7554/eLife.88538 (PMC10602586; doi:10.7554/eLife.88538)
Supplement: Figure 3—source data 1. [file elife-88538-fig3-data1.xlsx]

## Sheet: Fig3
Figure 3-source data 1. Restricted PheWAS associations between APOL1 high-risk genotype and sepsis-related phenotypes: expanded summary data
PheCode	Description	PheCode group	Total N	Case N	Control N	Beta	SE	Odds Ratio	95% CI - lower bound	95% CI - upper bound	P-value
(A) All BioVU Black patients with MEGAEX genotypes (N=14713)
81	Infection/inflammation of internal prosthetic device; implant; and graft	infectious diseases	14328	423	13905	0.517968	0.122157	1.67861	1.3212	2.13271	2.23334e-05
994.1	Systemic inflammatory response syndrome (SIRS)	injuries & poisonings	13779	275	13504	0.39707	0.15388	1.48746	1.10017	2.01109	0.0098691
994.2	Sepsis	injuries & poisonings	14436	932	13504	0.341077	0.0891167	1.40646	1.18106	1.67489	0.000129551
994.21	Septic shock	injuries & poisonings	13832	328	13504	0.410569	0.142234	1.50767	1.14087	1.99241	0.00389459
38	Septicemia	infectious diseases	12113	868	11245	0.260357	0.0947637	1.29739	1.07747	1.5622	0.00600635
(B) All BioVU Black patients with MEGAEX genotypes, excluding those with pre-existing renal disease (N=12547)
81	Infection/inflammation of internal prosthetic device; implant; and graft	infectious diseases	12278	220	12058	0.248824	0.191567	1.28252	0.881045	1.86693	0.193982
994.1	Systemic inflammatory response syndrome (SIRS)	injuries & poisonings	12054	164	11890	0.103865	0.224999	1.10945	0.713813	1.72437	0.644352
994.2	Sepsis	injuries & poisonings	12368	478	11890	0.0118527	0.139668	1.01192	0.769591	1.33056	0.93237
994.21	Septic shock	injuries & poisonings	12033	143	11890	0.0760276	0.245155	1.07899	0.667326	1.74461	0.756469
38	Septicemia	infectious diseases	10467	444	10023	-0.0580504	0.148025	0.943602	0.705972	1.26122	0.694935
red text indicates a statistically significant value
